# Supplementary material
Source: PubMed Central journal article supplement (PMC2688982)
Supplement: 0811517106_0811517106SI.pdf [file 0811517106_0811517106SI.pdf]

# Supporting Information

## Mannige and Brooks 10.1073/pnas.0811517106

### SI Text

To show that canonical intrapentameric dihedral angles interact at  $\approx 138.19^\circ$ : Hexamers and pentamers within a canonical capsid (those capsids representable as “monohedral tilings” that display few holes, few overlaps and structural invariability; please see ref. 1 for a more rigorous description) may be treated as a 6- and 5-coordinated set of plates, respectively (Fig. S2 A–C).

**Statement.** Any canonical subunit that possesses the ability to form both pentamer and hexamer must possess intrapentamer dihedral angles of  $\approx 138.19^\circ$  (i.e., in Fig. S2D,  $\phi \approx 138.19^\circ$ ).

From the canonical capsid definitions (1), we find that (i) subunits can form both flat hexamers (Fig. S2B) and “curved” pentamers (Fig. S2C) from the same interface and (ii) all angles within a pentamer are identical [which is a reasonable assumption given that (i) these pentameric angles are formed from identical interfaces and not quasiequivalent ones and (ii) a 5-fold rotational symmetry element (axis) falls perpendicular to the center of pentamer in the crystal structure].

**Proof.** Specifically, from the right triangle  $b'o'a$  in Fig. S2D, we can obtain a relationship for the intrapentamer dihedral angle ( $\Phi$ ) and edge lengths:

$$\sin(\phi/2) = \frac{|o''a|}{|ab'|} \quad [\text{S1}]$$

We now assume that the edge of the equilateral triangular faces is 1 with no loss of generality. Given that right triangle  $ab'o$  is a 30–60–90 triangle and that  $|oa| = 1$ , we get

$$|ab'| = \sqrt{3}/2 \quad [\text{S2}]$$

Substituting Eq. S2 in Eq. S1 and rearranging, we get

$$\sin(\phi/2) = \frac{2}{\sqrt{3}} |o''a| \quad [\text{S3}]$$

Theta ( $\theta$ ) is the angle between the adjacent radiating edges once projected to a plane that contains a,b,c,d,e (there must be such a plane because all dihedral angles are set to the same value). From Fig. S2D, we get

$$|o''a| = |o'a| \sin(\theta) \quad [\text{S4}]$$

Substituting Eq. S4 into Eq. S3, we get

$$\sin(\phi/2) = \frac{2}{\sqrt{3}} |o'a| \sin(\theta) \quad [\text{S5}]$$

Also, from the 30–60–90 triangle  $o'aa'$  in Fig. S2C, because  $|aa'| = 1/2$ , we obtain

$$|o'a| = \frac{|a'a|}{\sin(\theta/2)} = \frac{1}{2\sin(\theta/2)}. \quad [\text{S6}]$$

Substituting Eq. S6 in Eq. S5 yields

$$\sin(\phi/2) = \frac{\sin(\theta)}{\sqrt{3}\sin(\theta/2)} \quad \text{or} \quad \phi = 2 \cdot \text{asin}\left(\frac{\sin(\theta)}{\sqrt{3}\sin(\theta/2)}\right). \quad [\text{S6}']$$

If all of the dihedral angles within the pentamer are alike, then  $\theta = 2\pi/5$  (this generalizes to  $\theta = 2\pi/i$  if the pentamer is actually an  $i$ -mer), and

$$\phi = 2 \cdot \text{asin}\left(\frac{\sin(2\pi/5)}{\sqrt{3}\sin(\pi/5)}\right) \approx 138.19^\circ.$$

This will be true for any set of canonical capsid subunits that assemble into pentamers, and is also seen in true icosahedra (20-faced deltahedra) that describe  $T = 1$  capsids, which, we claim, allows for  $T > 1$  to  $T = 1$  transformations (see main text).

1. Mannige RV, Brooks CL, III (2008) Tilable nature of virus capsids and the role of topological constraints in natural capsid design. *Phys Rev E* 77:051902.27.

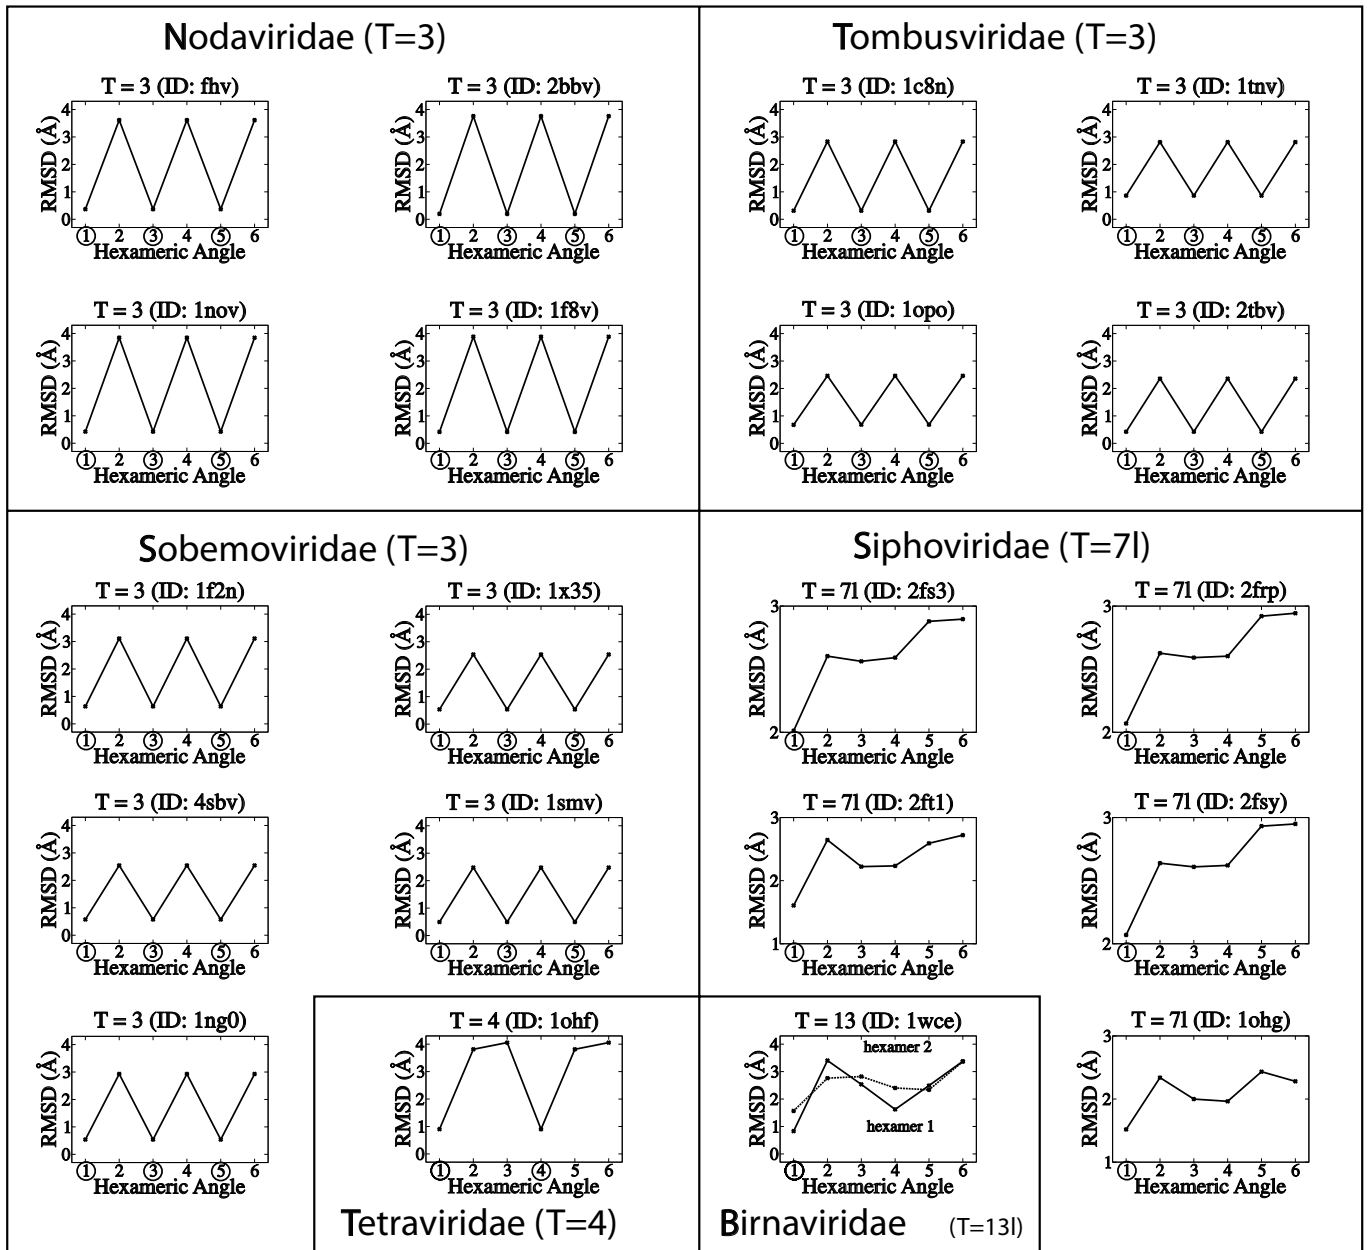

Fig. S1. Angle profiles of hexamers in unique environments when compared to a pentameric endo angle of the same capsid (low RMSD values indicate more pentamer-like angles) shown for individual capsids (indicated by their PDB ID or ID). This graph is an expanded version of Fig. 2A.

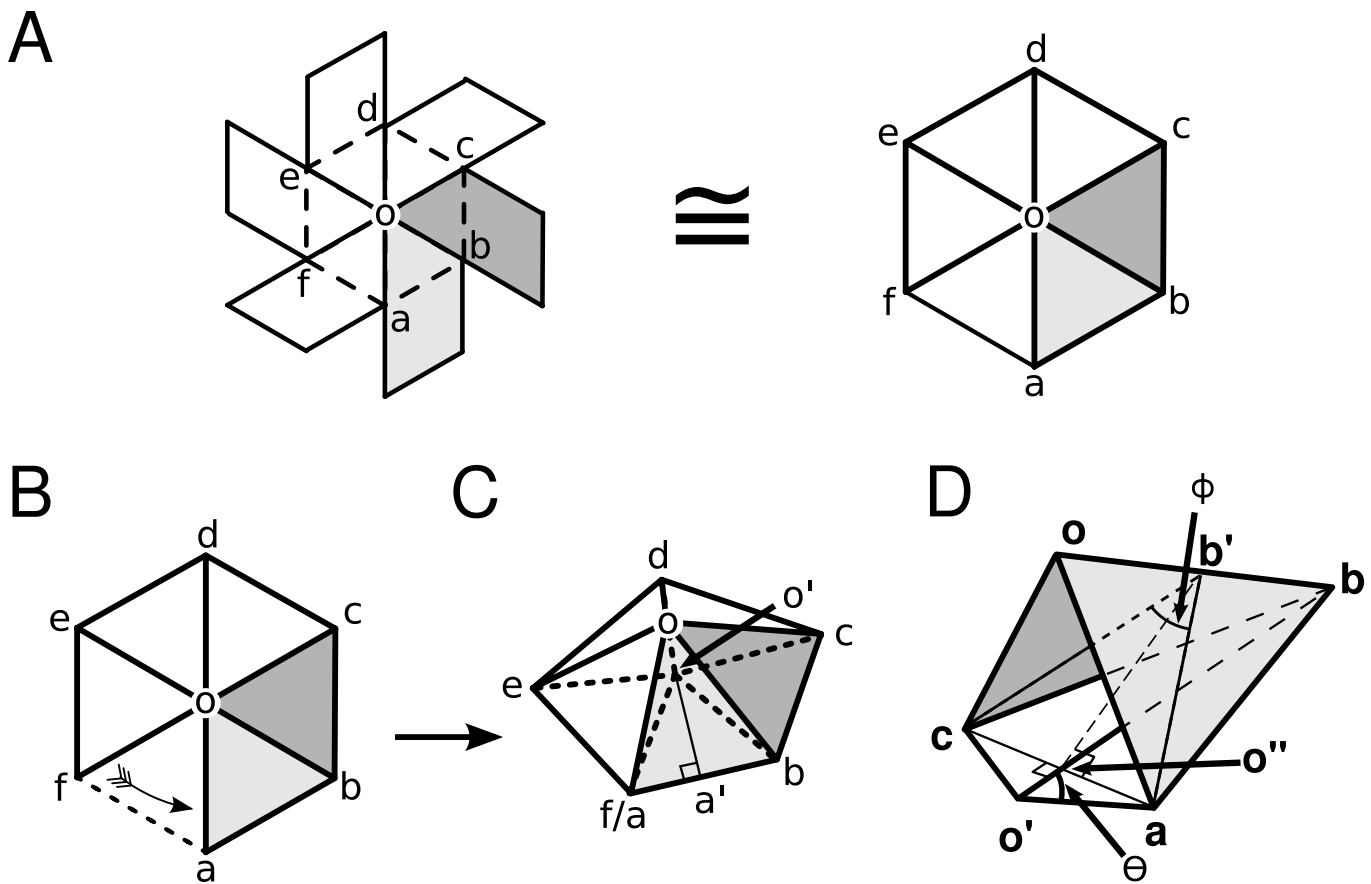

**Fig. 52.** Showing that  $\Phi \approx 138.19^\circ$ . (*A*) Indicates that  $n$ -valent clusters formed from trapezoids (shown in the diagram for hexamers) may be reduced/simplified to clusters of equilateral triangles for the purpose of analyzing dihedral angle properties. (*B* and *C*) Hexamers (*B*) and pentamers (*C*) in canonical capsids are formed from the same subunit interface that interact at varying dihedral angles. (*D*) A pair of adjacent subunits is shaded in the pentamer (*C*) and isolated environment (*D*), which will be used to obtain a relationship for the dihedral angle ( $\Phi$ ).

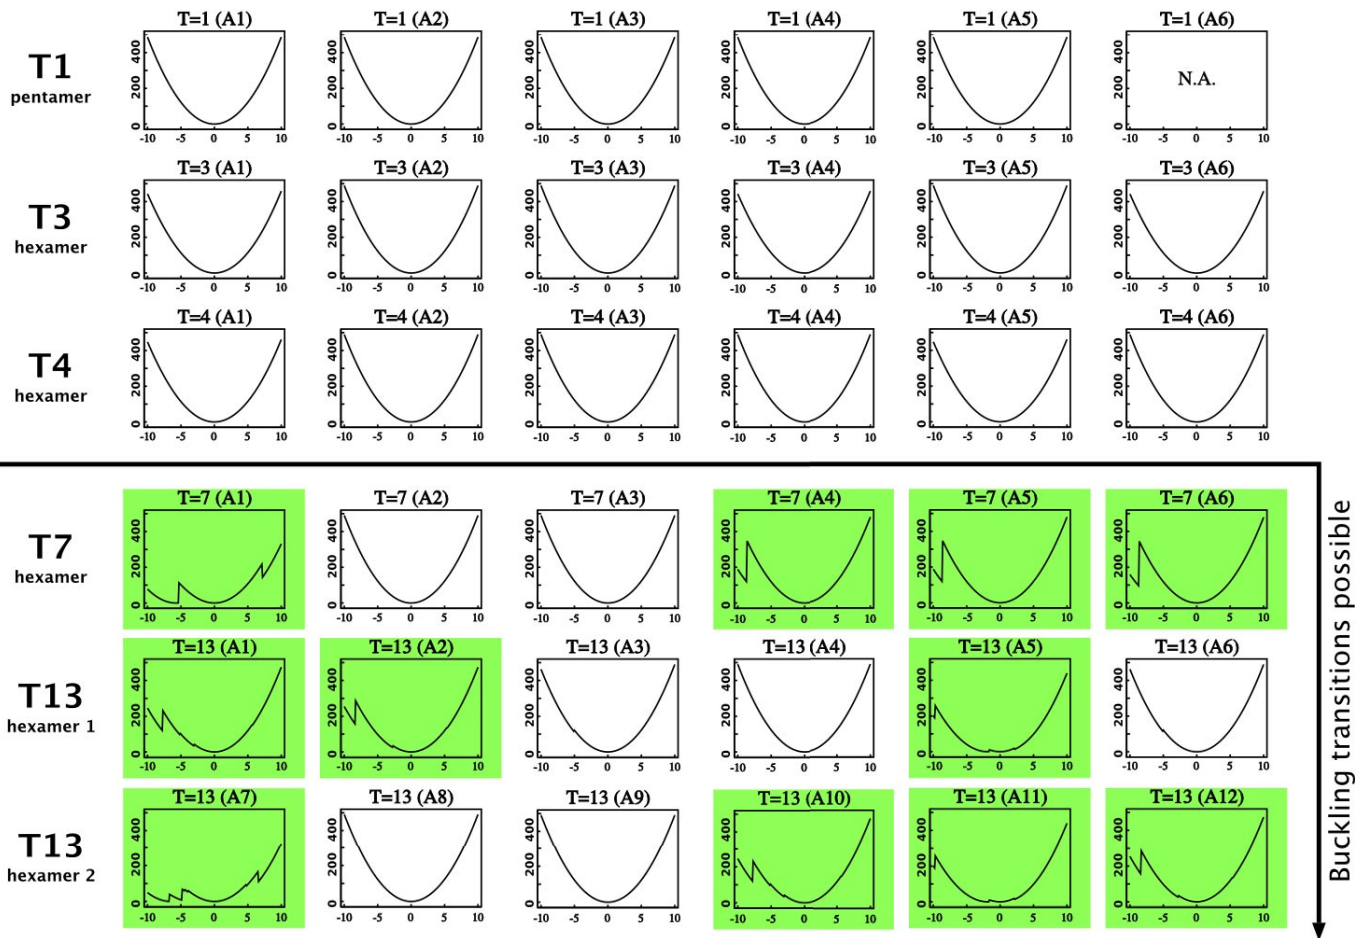

Fig. S3. Energy (y axis) vs. angle constraint disequilibrium ( $r_0 - r'$ ; x axis) profiles for individual angles (labeled A1–A6 for a unique hexamer and an additional A7–A12 for the second hexamer) within hexamers for capsids with  $T = 3, 4, 7,$  and  $13$ .  $T = 1$  pentameric angle profiles are included to give a sense for rigid angle profiles. Only  $T > 4$  canonical capsids hexamer angles (whose profiles are highlighted green) appear to sample multiple conformations upon application of small forces, indicating that buckling transitions are possible for only  $T > 4$  canonical capsids. This figure is an expansion of Fig. 4B in the main text.
